# Supplementary material for: Synthesis and characterization of M(ii) (M = Mn, Fe and Co) azafulvene complexes and their X3− derivatives
Source: Royal Society of Chemistry journal article supplement (doi:10.1039/c5dt00985e), 2015-01-01
Supplement: c5dt00985e1.pdf [file c5dt00985e1.pdf]

## Synthesis and Characterization of M(II) (M = Mn, Fe, and Co) Azafulvene-amine Complexes and their Pseudohalide Derivatives

*Ellen M. Matson,<sup>δ</sup> Yun Ji Park,<sup>δ</sup> Jeffery A. Bertke and Alison R. Fout\**

School of Chemical Sciences, University of Illinois at Urbana-Champaign, 600 S.  
Mathews Ave. Urbana, IL 61801.

### Supporting Information Table of Contents:

|                                                                                                                                 |   |
|---------------------------------------------------------------------------------------------------------------------------------|---|
| <b>Figure S1.</b> <sup>1</sup> H NMR Spectrum of [N(afa <sup>Cy</sup> ) <sub>3</sub> Co](OTf) <sub>2</sub> ( <b>3</b> ) .....   | 2 |
| <b>Figure S2.</b> Molecular structure of [N(afa <sup>Cy</sup> ) <sub>3</sub> Co](OTf) <sub>2</sub> ( <b>3</b> ).....            | 2 |
| <b>Table S1.</b> Crystallographic Parameters for complexes <b>3</b> , <b>4</b> , <b>6</b> , <b>7-8</b> , and <b>11-12</b> ..... | 3 |

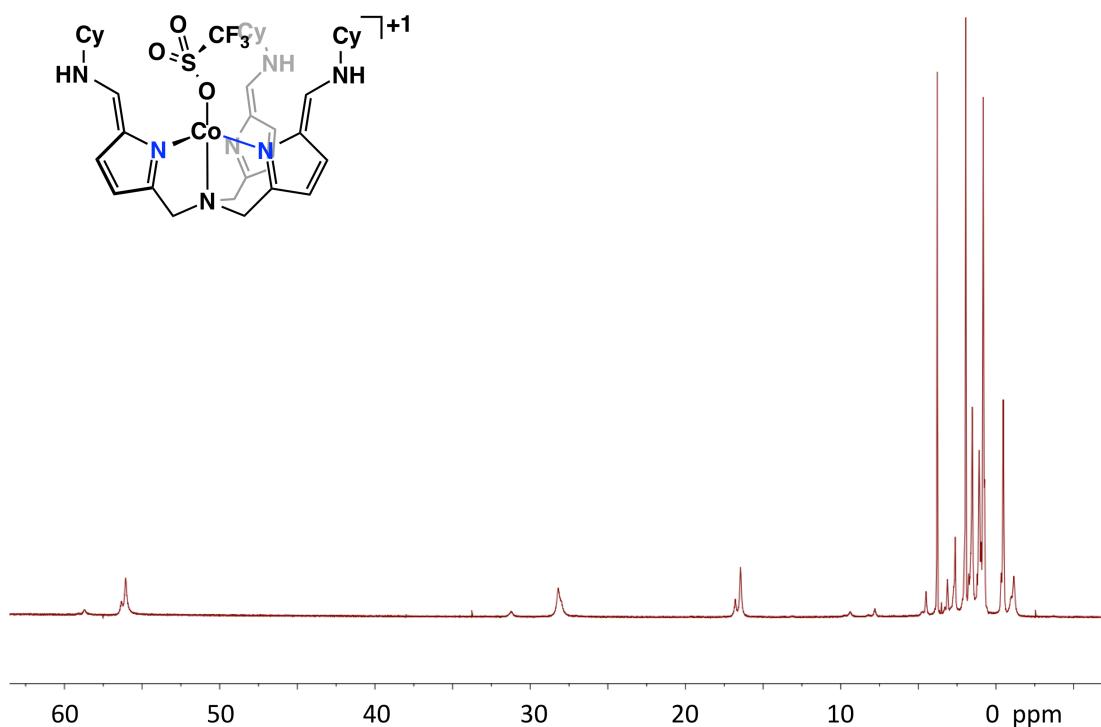

**Figure S1.**  $^1\text{H}$  NMR spectrum of **3** ( $\text{CD}_3\text{CN}$ ,  $25\text{ }^\circ\text{C}$ ).

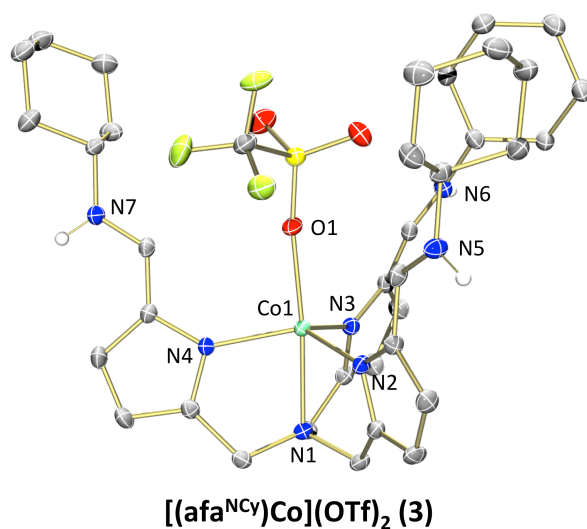

**Figure S2.** Molecular structure of **3** shown with 50% probability ellipsoids. Selected hydrogen atoms, counter ions and solvent molecules have removed for clarity. Selected bond lengths ( $\text{\AA}$ ): Co1-N1: 2.236(2), Co1-N2: 2.039(3), Co1-N3: 2.017(2), Co1-N4: 2.048(3), Co1-O1: 2.178(2).

**Table S1.** Crystallographic Parameters for complexes **3-4**, **6-8**, and **11-12** (L = [N(afa<sup>Cy</sup>)<sub>3</sub>]).

|                                   | [LCo] <sup>2+</sup> ( <b>3</b> )                                                              | [LMn(NCS)] <sup>1+</sup> ( <b>4</b> )                                                                         | [LCo(NCS)] <sup>1+</sup> ( <b>6</b> )                                                         | [LMn(NCO)] <sup>1+</sup> ( <b>7</b> )                                            | [LFe(NCO)] <sup>1+</sup> ( <b>8</b> )                                            | [LFe(N <sub>3</sub> )] <sup>1+</sup> ( <b>11</b> )                                | [LCo(N <sub>3</sub> )] <sup>1+</sup> ( <b>12</b> )                                                            |
|-----------------------------------|-----------------------------------------------------------------------------------------------|---------------------------------------------------------------------------------------------------------------|-----------------------------------------------------------------------------------------------|----------------------------------------------------------------------------------|----------------------------------------------------------------------------------|-----------------------------------------------------------------------------------|---------------------------------------------------------------------------------------------------------------|
| Empirical formula                 | C <sub>42</sub> H <sub>59</sub> CoF <sub>6</sub> N <sub>7</sub> O <sub>7</sub> S <sub>2</sub> | C <sub>79</sub> H <sub>105</sub> F <sub>6</sub> Mn <sub>2</sub> N <sub>16</sub> O <sub>6</sub> S <sub>4</sub> | C <sub>37</sub> H <sub>51</sub> CoF <sub>3</sub> N <sub>8</sub> O <sub>3</sub> S <sub>2</sub> | C <sub>42</sub> H <sub>60</sub> F <sub>3</sub> MnN <sub>8</sub> O <sub>5</sub> S | C <sub>42</sub> H <sub>61</sub> F <sub>3</sub> FeN <sub>8</sub> O <sub>5</sub> S | C <sub>44</sub> H <sub>69</sub> F <sub>3</sub> FeN <sub>12</sub> O <sub>5</sub> S | C <sub>83</sub> H <sub>111</sub> Co <sub>2</sub> F <sub>6</sub> N <sub>20</sub> O <sub>6</sub> S <sub>2</sub> |
| Formula weight                    | 1011.01                                                                                       | 1726.91                                                                                                       | 847.91                                                                                        | 827.48                                                                           | 902.89                                                                           | 991.02                                                                            | 1780.89                                                                                                       |
| Temperature                       | 176 K                                                                                         | 183 K                                                                                                         | 100 K                                                                                         | 183 K                                                                            | 175 K                                                                            | 173 K                                                                             | 166 K                                                                                                         |
| Wavelength                        | 0.71073                                                                                       | 1.54178                                                                                                       | 0.71073                                                                                       | 1.54178                                                                          | 0.71073                                                                          | 0.71073                                                                           | 0.71073                                                                                                       |
| Crystal system                    | Orthorhombic                                                                                  | Monoclinic                                                                                                    | Orthorhombic                                                                                  | Orthorhombic                                                                     | Orthorhombic                                                                     | Orthorhombic                                                                      | Monoclinic                                                                                                    |
| Space group                       | P 212121                                                                                      | P 2(1)/c                                                                                                      | P bca                                                                                         | -P 2ac 2ab                                                                       | P bca                                                                            | P bca                                                                             | P 2(1)/c                                                                                                      |
| Unit cell dimensions              | a = 10.718(2) Å<br>b = 16.199(3) Å<br>c = 27.605(6) Å                                         | a = 15.6420(3) Å<br>b = 23.493(4) Å<br>c = 25.1862(6) Å                                                       | a = 15.3462(4) Å<br>b = 23.0779(5) Å<br>c = 26.5156(7) Å                                      | a = 15.0279(13) Å<br>b = 23.222(2) Å<br>c = 26.969(2) Å                          | a = 14.860(3) Å<br>b = 23.493(4) Å<br>c = 26.472(5) Å                            | a = 15.225(2) Å<br>b = 23.068(3) Å<br>c = 26.462(4) Å                             | a = 15.471(4) Å<br>b = 23.427(6) Å<br>c = 24.935(7) Å                                                         |
|                                   | α = 90°<br>β = 90°<br>γ = 90°                                                                 | α = 90°<br>β = 101.847(1)°<br>γ = 90°                                                                         | α = 90°<br>β = 90°<br>γ = 90°                                                                 | α = 90°<br>β = 90°<br>γ = 90°                                                    | α = 90°<br>β = 90°<br>γ = 90°                                                    | α = 90°<br>β = 90°<br>γ = 90°                                                     | α = 90°<br>β = 101.761(3)°<br>γ = 90°                                                                         |
| Volume                            | 4792.8(16)                                                                                    | 9075.6(3)                                                                                                     | 9390.7(4)                                                                                     | 9411.6(14)                                                                       | 9241(3)                                                                          | 9294(2)                                                                           | 8848(4)                                                                                                       |
| Z                                 | 4                                                                                             | 4                                                                                                             | 8                                                                                             | 8                                                                                | 8                                                                                | 8                                                                                 | 4                                                                                                             |
| Reflections collected             | 10200                                                                                         | 16070                                                                                                         | 10288                                                                                         | 8372                                                                             | 8512                                                                             | 8582                                                                              | 16701                                                                                                         |
| Independent reflections           | 8543                                                                                          | 13635                                                                                                         | 8080                                                                                          | 6071                                                                             | 6461                                                                             | 6167                                                                              | 13176                                                                                                         |
| Goodness-of-fit on F <sup>2</sup> | 1.015                                                                                         | 1.047                                                                                                         | 1.039                                                                                         | 1.078                                                                            | 1.027                                                                            | 1.074                                                                             | 1.018                                                                                                         |
| Final R indices [I > 2σ(I)]       | R1 = 0.0373<br>wR2 = 0.0827                                                                   | R1 = 0.0407<br>wR2 = 0.1047                                                                                   | R1 = 0.0402<br>wR2 = 0.1063                                                                   | R1 = 0.0690<br>wR2 = 0.1634                                                      | R1 = 0.0445<br>wR2 = 0.1201                                                      | R1 = 0.0479<br>wR2 = 0.1220                                                       | R1 = 0.0366<br>wR2 = 0.0901                                                                                   |
| R indices                         | R1 = 0.0524<br>wR2 = 0.0881                                                                   | R1 = 0.0483<br>wR2 = 0.1090                                                                                   | R1 = 0.0563<br>wR2 = 0.1130                                                                   | R1 = 0.0972<br>wR2 = 0.1785                                                      | R1 = 0.0624<br>wR2 = 0.1340                                                      | R1 = 0.0741<br>wR2 = 0.1334                                                       | R1 = 0.0524<br>wR2 = 0.0995                                                                                   |
